## P1791

## Outcome prediction with regional wall motion abnormalities during stress echocardiography

Zagatina A.<sup>1</sup>; Ciampi Q.<sup>2</sup>; Cortigiani L.<sup>3</sup>; Gaibazzi N.<sup>4</sup>; Djordjevic-Dikic A.<sup>5</sup>; Borguezan Daros C.<sup>6</sup>; Wierzbowska-Drabik K.<sup>7</sup>; Kasprzak JD.<sup>7</sup>; Boshchenko A.<sup>8</sup>; Vrublevsky A.<sup>8</sup>; Zhuravskaya N.<sup>1</sup>; Dekleva M.<sup>9</sup>; Lattanzi F.<sup>10</sup>; Carpeggiani C.<sup>11</sup>; Picano E.<sup>11</sup>

<sup>1</sup>Saint Petersburg Pavlov State Medical University, Cardiology, Saint Petersburg, Russian Federation

<sup>2</sup>Fatebenefratelli Hospital, Division of Cardiology, Benevento, Italy

<sup>3</sup>San Luca Hospital, Cardiology, Lucca, Italy

<sup>4</sup>University Hospital of Parma, Cardiology, Parma, Italy

<sup>5</sup>Clinical center of Serbia, Cardiology, Belgrade, Serbia

<sup>6</sup>Hospital San José, Cardiology, Criciúma, Brazil

<sup>7</sup>Bieganski Hospital, Cardiology, Lodz, Poland

<sup>8</sup>Tomsk National Research Medical Centre of the Russian Academy of Sciences, Cardiology, tomsk, Russian Federation

<sup>9</sup>Medical Hospital Center Zvezdara, Cardiology, Belgrade, Serbia

<sup>10</sup>Cisanello Hospital, Cardiology, Pisa, Italy

<sup>11</sup>Institute of Clinical Physiology, CNR, Biomedicine Department, Pisa, Italy

**OnBehalf:** Stress Echo 2020 study group of the Italian Society of Cardiovascular Imaging

**Background:** Over the last 3 decades, we observed a progressive decline in the prognostic value of a negative stress echo (SE) test based on regional wall motion abnormalities (RWMA), likely reflecting both an increase in risk in patients (older and more often diabetics) as well as a potential decrease in test performance due to concomitant anti-ischemic therapy.

**Aim:** To assess the value of SE in predicting outcome in contemporary populations

**Methods:** From September 2016 to December 2018, we enrolled 1848 patients (age  $63 \pm 11$  years; 1121 males, 60%) with known or suspected coronary artery disease and/or heart failure evaluated with SE (exercise in 543, dipyridamole in 1184, adenosine in 10, dobutamine in 43) in 9 quality-controlled centers of 6 countries. Wall motion score index (WMSI) was evaluated at rest and peak stress (17-segment model, from 1 = normal-hyperkinetic to 4 = dyskinetic). All patients were followed-up for a median of 16 months.

**Results** WMSI was  $1.09 \pm 0.23$  at rest and increased during stress ( $1.17 \pm 0.32$ ,  $p < .001$ ). At individual patient analysis, inducible ischemia with RWMA was present in 352 pts (18.8%). At follow-up, there were 218 events: 22 deaths, 22 non-fatal myocardial infarctions, 62 hospital admissions for acute heart failures, and 112 late (>3 months from SE) myocardial revascularizations. Multivariable analysis identified stress-induced RWMA (Hazard Ratio 2.754, 95% Confidence Intervals: 2.053-3.963,  $p < 0.001$ ) as an independent predictor of events. Kaplan-Meier curves showed progressively worsening event-free survival for 1247 pts with normal (WMSI = 1.0), 298 pts with mildly (1.05-1.39), 250 pts with moderately (1.4-1.99) or 73 pts with severely (>2.0) abnormal peak WMSI: see figure. In patients with negative SE, event-rate was 1.4% per year considering hard events (death and myocardial infarction) and 0.8 % per year considering only death.

**Conclusion** RWMA show risk stratification capability in contemporary patients referred to SE testing. The higher the peak WMSI, and the worse the prognosis. Nevertheless, the positivity rate is low (< 20%) and patients with normal baseline and stress function still have a significant event rate. A more comprehensive risk assessment with other parameters is warranted

Abstract P1791 Figure. Survival curves and peak WMSI

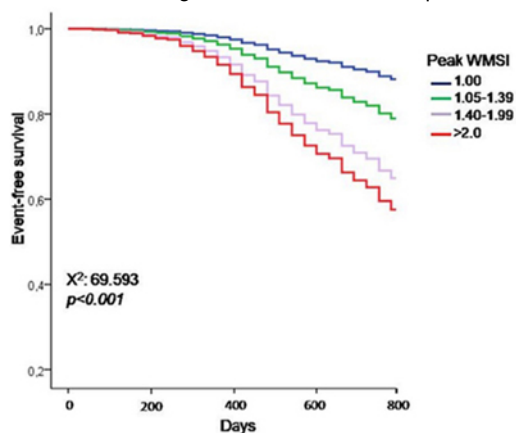

Source: http://academic.oup.com/ehjcimaging/article-pdf/21/Supplement_1/jez319.1147/31864286/jez319.1147.pdf
